# Supplementary material for: A New Hybrid Decision Making Approach for Housing Suitability Mapping of an Urban Area
Source: Hindawi journal article supplement (doi:10.1155/2018/7038643), 2018-10-15
Supplement: f1 [file 7038643.f1.doc]

**1. Fuzzy DEMATEL Method**

Step 1: Identify the decision goal and set up a committee.

Step 2: Develop the evaluation criteria and design the fuzzy linguistic scale.

Step 3: Acquire and average the assessments of decision makers.

Step 4: Steps of CFCS defuzzification Method

Let
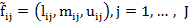
 be triangular fuzzy numbers, where
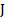
 is the number of alternatives. The value of i-th criterion could be determined by following four step CFCS algorithm:

Normalization

|  | (1) |
| --- | --- |

Compute for each alternatives (
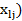


|  | (2) |
| --- | --- |

Compute left score and right score normalized values
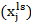
:

|  | (3) |
| --- | --- |

Compute total normalized crisp value
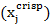
:

|  | (4) |
| --- | --- |

Compute crisp values for
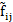
:

|  | (5) |
| --- | --- |

Step 5: Acquire the normalized direct-relation fuzzy matrix
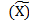
.

|  | (6) |
| --- | --- |

Step 6: Acquire the total-relation fuzzy matrix
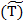


|  | (7) |
| --- | --- |

Step 7: Determine the criteria weights
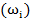
 (Dalalah et al. 2011).

|  | (8) |
| --- | --- |

*(9)*

|  | (10) |
| --- | --- |

**2. CMA-ES Method**

CMA-ES algorithm consists of four steps as shown below. All equations and Nomenclature related with CMA-ES was taken from (Kacprzyk, 2006)

**NOMENCLATURE**


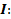
Identity matrix, unity matrix
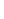


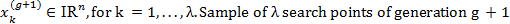


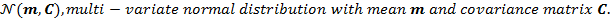


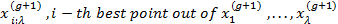


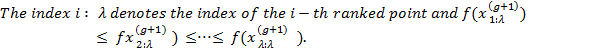


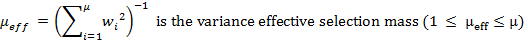


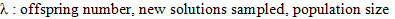


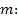
 favorite (incumbent) solution at a given iteration (mean value of the search distribution at generation


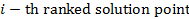


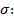
 overall scaling - step-size of the algorithm (“overall” standard deviation,)


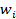
, where i = 1,2 . . . , λ, recombination weights

µ: parent number, solutions involved in updates of m, C, and
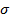


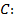
 Symmetric definite positive matrix - encodes the geometric shape of the distribution


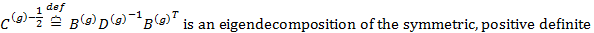


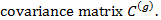


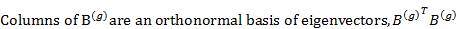
=
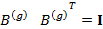


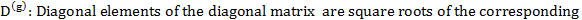


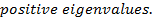


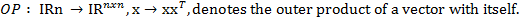


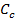
 ≤ 1, learning rate for cumulation for the rank-one update of the covariance matrix


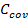
 ≤ 1 learning rate for the covariance matrix update


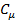
 ≤ 1 − c1, learning rate for the rank-µ update of the covariance matrix update


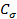
 < 1, learning rate for the cumulation for the step size control,

D ∈
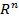
, a diagonal matrix

p ∈
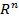
, evolution path, a sequence of successive (normalized) steps, the strategy takes over a number of generations.


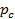
 ∈
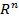
, evolution path at generation


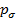
 ∈
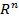
 is the conjugate evolution path at generation

**Step 1: Sampling new population of search points:**

New population of search points Xk for every generation “g+1” and λ offsprings are generated by sampling a multi variate normal distribution as given in equation (19).

(1)

Where
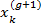
 represents the Kth sample member solution vector.

**Step 2: Selection and Recombination: Choosing the Mean**

The µ best individuals are selected for the next generation (g + 1). Normally, µ is chosen as half of the population size λ. evaluated and sorted depending their fitness function value. The new mean m(g+1) is the weighted average of µ selected vectors.

(2)

i: λ denotes the index of ith ranked individual. The center of the next population is determined by Eq. (2).

**Step 3: Adaptation of Covariance matrix (C )**

The evolution path Pc(g+1) for adapting the co-variance matrix (C) is evaluated as given in Eq. (3).

(3)

Then, the covariance matrix C(g) is updated using the evolution path (Pc) as in Eq. (4).

(4)

**Step 4: Step Size Control**

The evolution path Pσ(g+1) for controlling step size is computed using Eq. (5)

(5)

The updation of step size is given in Eq. (6).

(6)

**Step 5**: If the stopping criterion is satisfied, then stop the algorithm, Otherwise go to step 1.

**Default Values (**taken from (Kacprzyk, 2006)**)**

Default parameters λµ, ԝi, cσ, dσ, cc, ccov, µcov, µeff used in the CMA-ES algorithm are given as follows.

(7)

(8)

(9)

(10)

(11)

**Application**

1. FDEMATEL linguistic variables table

2. FDEMATEL decision matrix

3. The generalized direct-relation matrix X.

4. Total-relation matrix T

5. FDEMATEL weight calculation
